# Supplementary material for: Effect of Community Health Workers on 30-Day Hospital Readmissions in an Accountable Care Organization Population: A Randomized Clinical Trial
Source: PubMed Central journal article supplement (PMC8138690; doi:10.1001/jamanetworkopen.2021.10936), 2021-05-20
Supplement: jamanetwopen-e2110936-s002.pdf [file jamanetwopen-e2110936-s002.pdf]

## Supplemental Online Content

Carter J, Hassan S, Walton A, Yu L, Donelan K, Thorndike AN. Effect of community health workers on 30-day hospital readmissions in an accountable care organization population: a randomized clinical trial. *JAMA Netw Open*. 2021;4(5):e2110936.  
doi:10.1001/jamanetworkopen.2021.10936

**eAppendix.** Summary of IRB Protocol Changes

**eTable 1.** Adjusted and Unadjusted Analysis for Clinical Outcomes of All Intervention and Control Participants

**eTable 2.** Discharge Disposition Subgroup Analysis With Clinical Outcomes for Intervention and Control Participants Discharged to Rehabilitation vs Home

**eTable 3.** Adjusted and Unadjusted Analysis for Clinical Outcomes of 127 Participants Discharged to Short-Stay Rehabilitation Prior to Home

**eTable 4.** Adjusted and Unadjusted Analysis for Clinical Outcomes of 423 Participants Discharged Home

This supplemental material has been provided by the authors to give readers additional information about their work.

**eAppendix.** Summary of IRB Protocol Changes

| <b>Date of Proposed Change</b> | <b>Date Accepted by IRB</b> | <b>Description of Change</b>                                                                                                                                                                                                                                                                    |
|--------------------------------|-----------------------------|-------------------------------------------------------------------------------------------------------------------------------------------------------------------------------------------------------------------------------------------------------------------------------------------------|
| March 6, 2017                  | April 6, 2017               | Staff amendment                                                                                                                                                                                                                                                                                 |
| April 18, 2017                 | April 26, 2017              | Staff amendment                                                                                                                                                                                                                                                                                 |
| April 28, 2017                 | May 12, 2017                | More explicit description of the hospital database identifying patients as high risk for readmission with $\geq 2$ hospitalizations in the prior 6 months or $>3$ hospitalizations the prior 12 months; add a more explicit description of Partners Healthcare patients to eligibility criteria |
| May 20, 2017                   | June 2, 2017                | Staff amendment                                                                                                                                                                                                                                                                                 |
| June 1, 2017                   | June 12, 2017               | Staff amendment                                                                                                                                                                                                                                                                                 |
| June 8, 2017                   | June 29, 2017               | Staff amendment                                                                                                                                                                                                                                                                                 |
| June 8, 2017                   | June 29, 2017               | Staff amendment                                                                                                                                                                                                                                                                                 |
| August 19, 2017                | August 30, 2017             | Extension of study to additional floors to meet target enrollment                                                                                                                                                                                                                               |
| August 19, 2017                | September 4, 2017           | Staff amendment                                                                                                                                                                                                                                                                                 |
| September 11, 2017             | September 13, 2017          | Staff amendment                                                                                                                                                                                                                                                                                 |
| January 23, 2018               | January 26, 2018            | Staff amendment                                                                                                                                                                                                                                                                                 |
| January 14, 2018               | February 5, 2018            | Staff amendment                                                                                                                                                                                                                                                                                 |
| October 29, 2018               | November 2, 2018            | Staff amendment                                                                                                                                                                                                                                                                                 |
| August 6, 2018                 | January 17, 2019            | Staff amendment                                                                                                                                                                                                                                                                                 |
| January 31, 2019               | January 31, 2019            | Staff amendment                                                                                                                                                                                                                                                                                 |
| June 11, 2019                  | June 26, 2019               | Staff amendment                                                                                                                                                                                                                                                                                 |
| October 13, 2019               | October 13, 2019            | Staff amendment                                                                                                                                                                                                                                                                                 |
| January 19, 2020               | January 27, 2020            | Staff amendment                                                                                                                                                                                                                                                                                 |
| June 9, 2020                   | June 9, 2020                | Staff amendment                                                                                                                                                                                                                                                                                 |

**eTable 1.** Adjusted and Unadjusted Analysis for Clinical Outcomes of All Intervention and Control Participants

|                                        | Control (n-273) N (%) | Intervention (n-277) N (%) | P value | Unadjusted Odds Ratio (95% CI) | Adjusted Odds Ratio * (95% CI) |
|----------------------------------------|-----------------------|----------------------------|---------|--------------------------------|--------------------------------|
| Hospital Readmissions                  | 67 (24.5)             | 35 (12.6)                  | 0.0003  | 0.44 (0.28, 0.70)              | 0.45 (0.29, 0.72)              |
| Missed Primary Care or Specialty Appts | 92 (33.7)             | 61 (22.0)                  | 0.002   | 0.56 (0.38, 0.81)              | 0.56 (0.38, 0.82)              |
| Emergency Department Visits            | 46 (16.8)             | 31 (11.2)                  | 0.056   | 0.62 (0.38, 1.02)              | 0.62 (0.38, 1.02)              |

\*Covariates include age, race, sex, number of hospitalizations, insurance, living alone, and discharge disposition

**eTable 2.** Discharge Disposition Subgroup Analysis With Clinical Outcomes for Intervention and Control Participants Discharged to Rehabilitation vs Home

|                    | Home    |              |       | Short-term Rehabilitation |              |         |
|--------------------|---------|--------------|-------|---------------------------|--------------|---------|
|                    | Control | Intervention | P     | Control                   | Intervention | P       |
| N                  | 206     | 217          |       | 67                        | 60           |         |
| Readmission %      | 20.4    | 14.7         | 0.13  | 37.3                      | 5.0          | <0.0001 |
| ED visit %         | 15.5    | 12.0         | 0.29  | 20.9                      | 8.3          | 0.048   |
| Miss appointment % | 33.0    | 22.1         | 0.012 | 35.8                      | 21.7         | 0.08    |

**eTable 3.** Adjusted and Unadjusted Analysis for Clinical Outcomes of 127 Participants Discharged to Short-Stay Rehabilitation Prior to Home

|                                        | Control<br>(n=67) N (%) | Intervention<br>(n=60) N (%) | P value | Unadjusted Odds<br>Ratio (95% CI) | Adjusted Odds<br>Ratio * (95% CI) |
|----------------------------------------|-------------------------|------------------------------|---------|-----------------------------------|-----------------------------------|
| Hospital Readmissions                  | 25 (37.3)               | 3 (5)                        | 0.0002  | 0.09 (0.03, 0.31)                 | 0.08 (0.02, 0.30)                 |
| Missed Primary Care or Specialty Appts | 24 (35.8)               | 13 (21.7)                    | 0.048   | 0.50 (0.22, 1.09)                 | 0.39 (0.16, 0.96)                 |
| Emergency Department Visits            | 14 (20.9)               | 5 (8.3)                      | 0.08    | 0.34 (0.12, 1.02)                 | 0.33 (0.11, 1.06)                 |

\*Covariates include age, race, sex, number of hospitalizations, insurance, living alone

**eTable 4.** Adjusted and Unadjusted Analysis for Clinical Outcomes of 423 Participants Discharged Home

|                                        | Control<br>(n=206) N (%) | Intervention<br>(n=217) N (%) | P value | Unadjusted Odds<br>Ratio (95% CI) | Adjusted Odds<br>Ratio* (95% CI) |
|----------------------------------------|--------------------------|-------------------------------|---------|-----------------------------------|----------------------------------|
| Hospital Readmissions                  | 42 (20.4)                | 32 (14.7)                     | 0.13    | 0.68 (0.41, 1.12)                 | 0.68 (0.41, 1.15)                |
| Missed Primary Care or Specialty Appts | 68 (33.0)                | 48 (22.1)                     | 0.012   | 0.58 (0.37, 0.89)                 | 0.57 (0.37, 0.89)                |
| Emergency Department Visits            | 32 (15.5)                | 26(12.0)                      | 0.29    | 0.74 (0.42, 1.29)                 | 0.76 (0.43, 1.33)                |

\*Covariates include age, race, sex, number of hospitalizations, insurance, living alone
