# Supplementary material for: Effect of Community Health Workers on 30-Day Hospital Readmissions in an Accountable Care Organization Population: A Randomized Clinical Trial
Source: PubMed Central journal article supplement (PMC8138690; doi:10.1001/jamanetworkopen.2021.10936), 2021-05-20
Supplement: jamanetwopen-e2110936-s003.pdf [file jamanetwopen-e2110936-s003.pdf]

## Data Sharing Statement

Carter. Effect of Community Health Workers on 30-Day Hospital Readmissions in an Accountable Care Organization Population. *JAMA Netw Open*. Published May 20, 2021.

doi:10.1001/jamanetworkopen.2021.10936

### Data

**Data available:** Yes

**Data types:** Deidentified participant data, Data dictionary

**How to access data:** Upon request to corresponding author Jocelyn Carter ([jcarter0@mg.harvard.edu](mailto:jcarter0@mg.harvard.edu))

**When available:** With publication

### Supporting Documents

**Document types:** None

### Additional Information

**Who can access the data:** Researchers whose proposed use of the data has been approved

**Types of analyses:** For specified purpose presented at the time of the request

**Mechanisms of data availability:** After approval of a proposal and with a signed data access agreement
